# Supplementary material for: Novel Three-Finger Neurotoxins from Naja melanoleuca Cobra Venom Interact with GABAA and Nicotinic Acetylcholine Receptors
Source: MDPI journal article supplement (doi:10.3390/toxins13020164), 2021-02-20
Supplement: s1 [file s1]

## Supplementary Materials: Novel Three-Finger Neurotoxins from *Naja melanoleuca* Cobra Venom Interact with GABA<sub>A</sub> and Nicotinic Acetylcholine Receptors

Lina Son, Elena Kryukova, Rustam Ziganshin, Tatyana Andreeva, Denis Kudryavtsev, Igor Kasheverov, Victor Tsetlin and Yuri Utkin

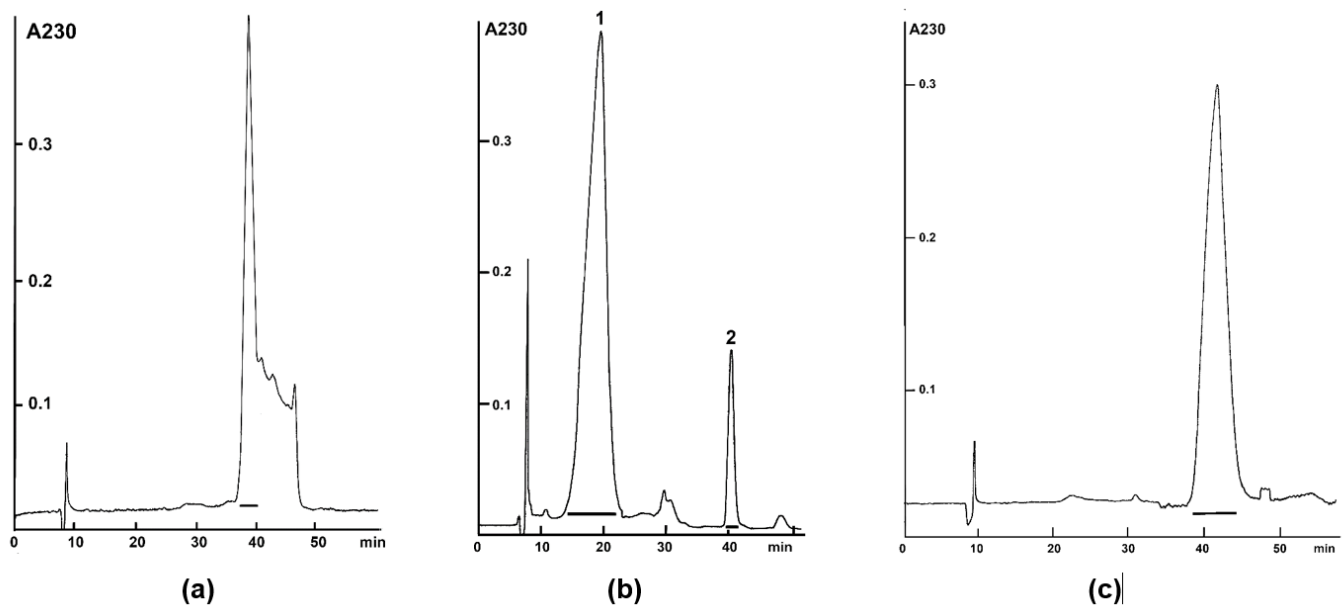

**Figure S1.** Separation of fractions 2 (a), 3 (b) and 4 (c) after ion exchange chromatography (Figure 1b) by reversed phase HPLC on Jupiter C18 column (10 × 250 mm, Phenomenex, Torrance, CA, USA) in a gradient of acetonitrile 20–35% in 60 min in the presence of 0.1% trifluoroacetic acid, at a flow rate of 2.0 mL/min. The horizontal bars indicate the fraction collected for Tx-NM2 (a), Tx-NM3-1 and Tx-NM3-2 (b), as well as Tx-NM4 (c).

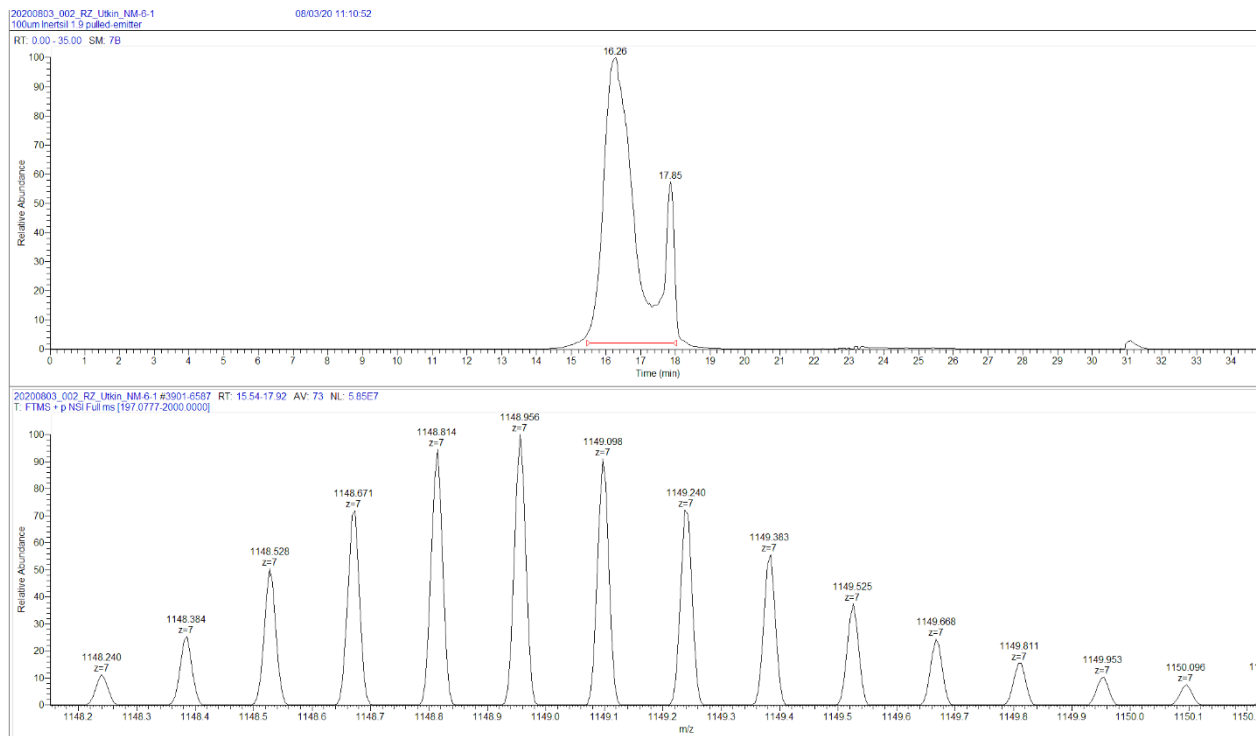

(a)

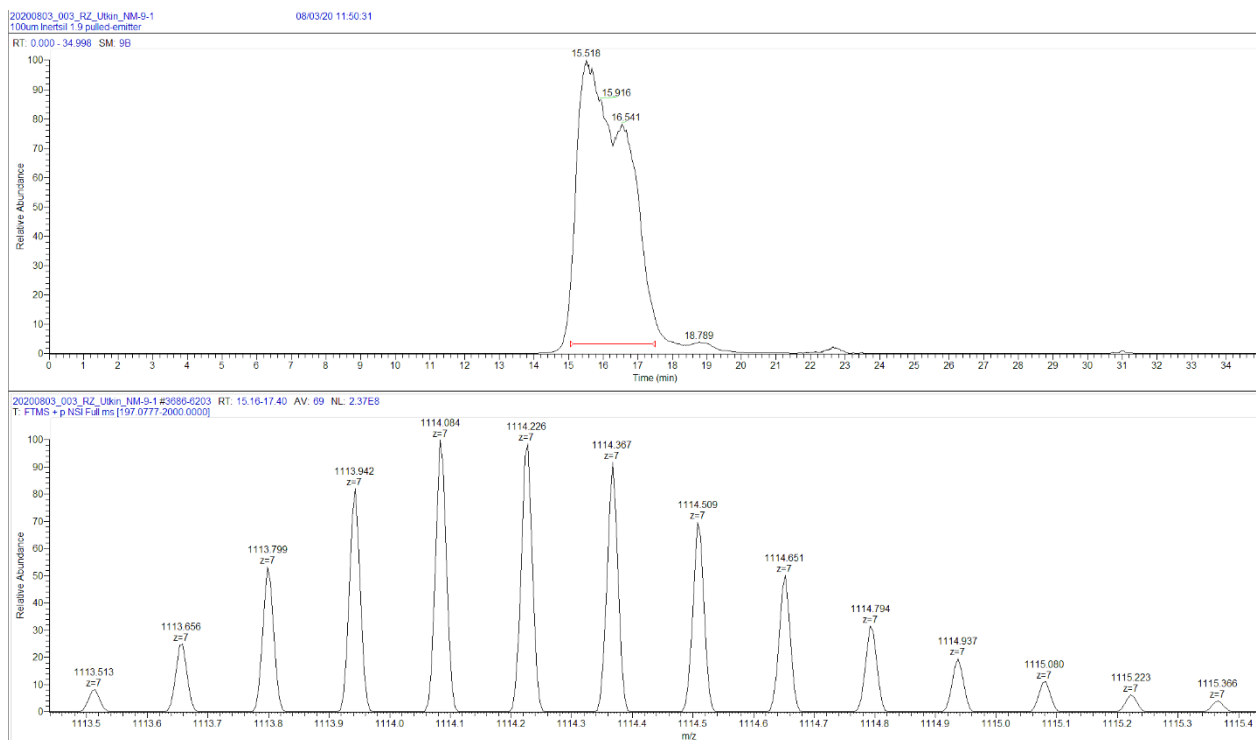

(b)

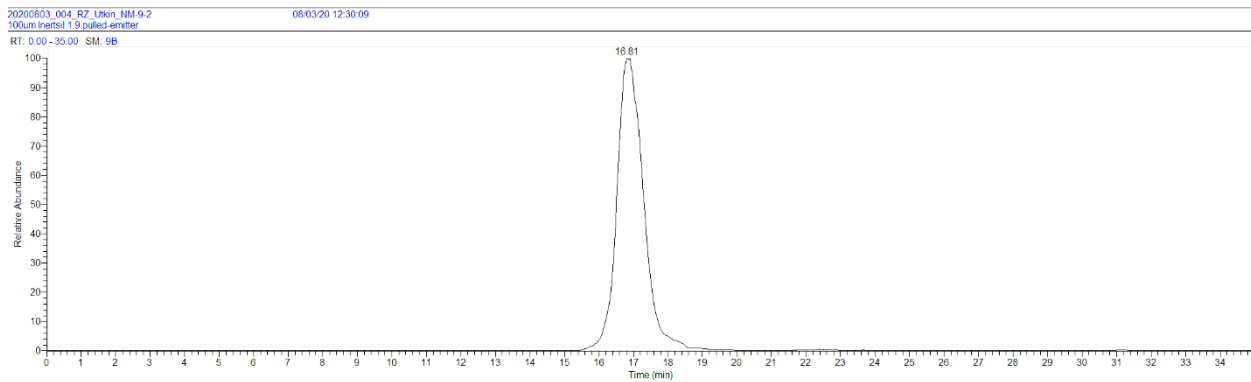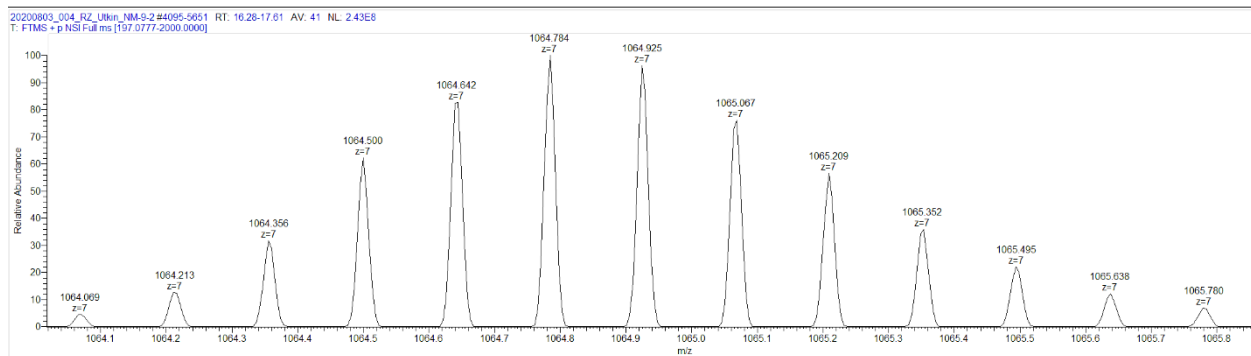

(c)

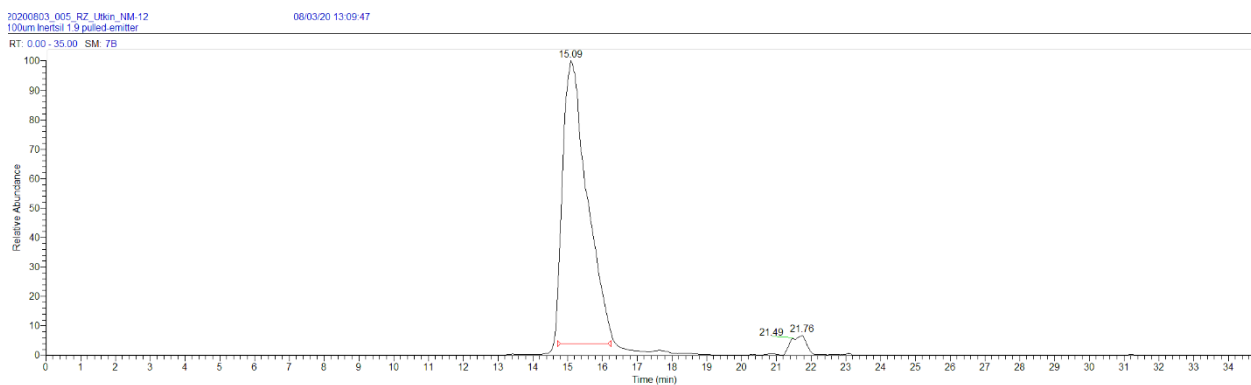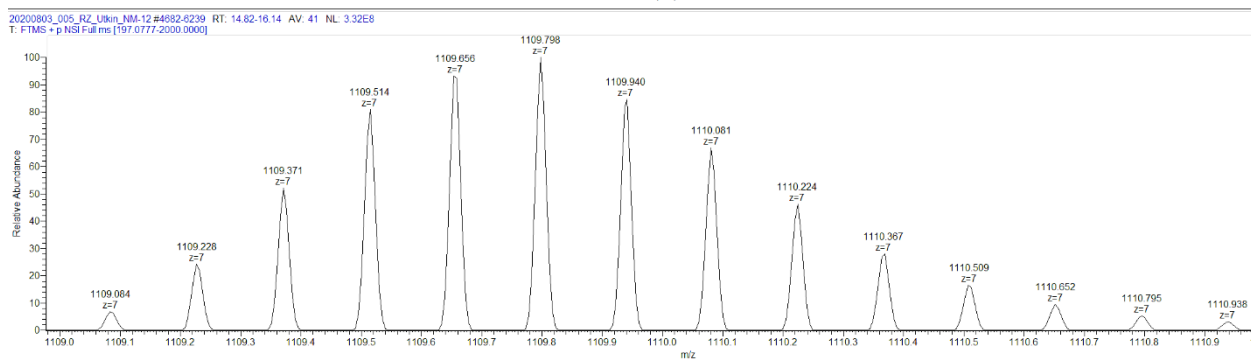

(d)

**Figure S2.** Extracted-ion chromatogram (XIC) from an LC-MS analysis and high-resolution spectra at  $z = 7$  for toxins Tx-NM2, XIC at  $m/z = 1148.5–1149.5$  (a); Tx-MN3-1, XIC at  $m/z = 1113.5–1114.5$  (b); Tx-Nm3-2, XIC at  $m/z = 1064.5–1065.5$  (c); and Tx-NM4, XIC at  $m/z = 1109.5–1110.5$  (d). Each of two peaks observed for Tx-NM2 (a) and Tx-MN3-1 (b) give the same masses and represent toxin conformers. The signals with the lowest  $m/z$  ratio were used for the calculation of the monoisotopic mass by the following formula—protein mass =  $(m/z \times z) - M_H \times z$ , where  $z$  is charge state equal to 7;  $M_H$ , atomic mass of proton equal to 0.998 a.u.
